# Supplementary material for: Occurrence of Aflatoxins in Edible Vegetable Seeds and Oil Samples Available in Pakistani Retail Markets and Estimation of Dietary Intake in Consumers
Source: MDPI journal article supplement (doi:10.3390/ijerph18158015), 2021-07-29
Supplement: s1 [file s1]

Sunflower oil and seeds

| Branded oil |       |       | Unbranded oil |      |      | Branded seeds |       |       | Unbranded seeds |       |       |
|-------------|-------|-------|---------------|------|------|---------------|-------|-------|-----------------|-------|-------|
| SR. #       | AFB1  | TAFs  | SR.#          | AFB1 | TAFs | SR. #         | AFB1  | TAFs  | SR.#            | AFB1  | TAFs  |
| 1           | 4.50  | 9.10  | 1             | 10.5 | 13.5 | 1             | 4.3   | 11.3  | 1               | 6.7   | 18.5  |
| 2           | 7.80  | 13.5  | 2             | 9.6  | 14.5 | 2             | 6.5   | 18.9  | 2               | 6.8   | 21.5  |
| 3           | 3.50  | 11.70 | 3             | 2.5  | 13.5 | 3             | 5.7   | 20.6  | 3               | 8.5   | 22.4  |
| 4           | 6.78  | 12.50 | 4             | 7.7  | 14.5 | 4             | 6.5   | 13.6  | 4               | 8.5   | 15.5  |
| 5           | 15.80 | 25.70 | 5             | 22.8 | 28.9 | 5             | 123.5 | 140.7 | 5               | 125.5 | 148.6 |
| 6           | 37.70 | 45.6  | 6             | 41.6 | 49.6 | 6             | 36.5  | 38.9  | 6               | 38.5  | 42.5  |
| 7           | 14.6  | 25.7  | 7             | 19.6 | 28.7 | 7             | 21.4  | 21.9  | 7               | 25.4  | 27.5  |
| 8           | 8.9   | 35.8  | 8             | 9.10 | 38.9 | 8             | 5.6   | 14.6  | 8               | 6.5   | 15.5  |
| 9           | 6.5   | 11.5  | 9             | 8.9  | 12.5 | 9             | 7.6   | 19.6  | 9               | 7.5   | 21.5  |
| 10          | 2.4   | 9.8   | 10            | 3.6  | 14.5 | 10            | 7.3   | 13.5  | 10              | 8.5   | 14.5  |
| 11          | 3.5   | 15.6  | 11            | 6.7  | 22.6 | 11            | 5.7   | 11.6  | 11              | 6.5   | 14.5  |
| 12          | 6.7   | 15.7  | 12            | 2.4  | 11.5 | 12            | 10.6  | 21.6  | 12              | 12.5  | 22.5  |
|             |       |       | 13            | 3.6  | 18.9 | 13            | 22.6  | 29.7  | 13              | 25.5  | 32.5  |
|             |       |       | 14            | 2.5  | 11.5 | 14            | 16.7  | 26.9  | 14              | 18.5  | 29.5  |
|             |       |       | 15            | 2.4  | 21.6 | 15            | 22.5  | 33.5  | 15              | 25.4  | 36.5  |
|             |       |       |               |      |      | 16            | 15.6  | 34.6  | 16              | 18.5  | 39.5  |
|             |       |       |               |      |      | 17            | 9.23  | 24.6  | 17              | 10.5  | 26.5  |
|             |       |       |               |      |      | 18            | 4.5   | 14.6  | 18              | 5.5   | 15.5  |
|             |       |       |               |      |      |               |       |       | 19              | 8.5   | 11.4  |
|             |       |       |               |      |      |               |       |       | 20              | 9.4   | 15.5  |
|             |       |       |               |      |      |               |       |       |                 |       |       |

Soyabean oil and seeds

| Branded oil |      |      | Unbranded oil |      |      | Branded seeds |      |      | Unbranded seeds |      |      |
|-------------|------|------|---------------|------|------|---------------|------|------|-----------------|------|------|
| SR. #       | AFB1 | TAFs | SR.#          | AFB1 | TAFs | SR. #         | AFB1 | TAFs | SR.#            | AFB1 | TAFs |
| 1           | 4.5  | 6.5  | 1             | 5.6  | 7.8  | 1             | 6.8  | 11.5 | 1               | 7.8  | 12.5 |
| 2           | 12.5 | 20.5 | 2             | 13.5 | 25.6 | 2             | 47.8 | 67.9 | 2               | 50.4 | 69.8 |
| 3           | 3.4  | 10.5 | 3             | 4.5  | 12.4 | 3             | 5.6  | 15.6 | 3               | 5.4  | 11.3 |
| 4           | 2.5  | 14.6 | 4             | 3.5  | 16.5 | 4             | 4.6  | 19.5 | 4               | 5.7  | 20.5 |
| 5           | 34.6 | 94.5 | 5             | 44.5 | 95.6 | 5             | 48.6 | 93.5 | 5               | 54.6 | 98.5 |
| 6           | 45.6 | 54.6 | 6             | 34.5 | 44.5 | 6             | 36.5 | 57.8 | 6               | 34.6 | 58.7 |
| 7           | 2.5  | 6.7  | 7             | 4.5  | 9.6  | 7             | 5.6  | 10.5 | 7               | 6.5  | 14.5 |
| 8           | 8.9  | 9.5  | 8             | 11.5 | 23.5 |               |      |      | 8               | 7.6  | 23.5 |
| 9           | 10.5 | 11.5 | 9             | 6.7  | 21.4 |               |      |      | 9               | 9.6  | 21.5 |
|             |      |      | 10            | 5.6  | 12.3 |               |      |      |                 |      |      |

Canola oil and seeds

| Branded oil |      |       | Unbranded oil |      |       | Branded seeds |      |       | Unbranded seeds |      |       |
|-------------|------|-------|---------------|------|-------|---------------|------|-------|-----------------|------|-------|
| SR. #       | AFB1 | TF    | SR.#          | AFB1 | TF    | SR. #         | AFB1 | TF    | SR.#            | AFB1 | TF    |
| 1           | 3.4  | 4.5   | 1             | 4.6  | 9.8   | 1             | 6.5  | 11.3  | 1               | 7.65 | 15.5  |
| 2           | 6.7  | 7.5   | 2             | 9.8  | 16.7  | 2             | 10.5 | 19.6  | 2               | 15.5 | 20.5  |
| 3           | 4.5  | 11.4  | 3             | 5.6  | 17.5  | 3             | 5.7  | 20.5  | 3               | 6.5  | 22/4  |
| 4           | 45.6 | 86.7  | 4             | 51.4 | 91.5  | 4             | 61.5 | 110.5 | 4               | 65.5 | 112.5 |
| 5           | 2.5  | 10.5  | 5             | 3.5  | 13.6  | 5             | 4.5  | 15.4  | 5               | 5.5  | 18.5  |
| 6           | 3.6  | 4.5   | 6             | 4.5  | 8.9   | 6             | 3.5  | 10.5  | 6               | 4.5  | 12.5  |
| 7           | 8.9  | 11.5  | 7             | 9.5  | 15.6  | 7             | 10.5 | 15.7  | 7               | 13.5 | 18.6  |
| 8           | 12.6 | 34.6  | 8             | 13.5 | 42.6  | 8             | 15.6 | 48.9  | 8               | 16.5 | 54.3  |
| 9           | 2.4  | 4.6   | 9             | 3.5  | 7.8   | 9             | 4,5  | 9.5   | 9               | 5.4  | 10.5  |
| 10          | 67.8 | 110.8 | 10            | 94.5 | 112.6 | 10            | 96.5 | 115.6 | 10              | 98.5 | 118.5 |
| 11          | 12.5 | 15.7  | 11            | 15.7 | 22.7  | 11            | 16.8 | 25.6  | 11              | 19.5 | 25.6  |
| 12          | 4.5  | 7.8   | 12            | 5.6  | 9.8   | 12            | 6.5  | 10.5  | 12              | 7.5  | 12.5  |
| 13          | 8.5  | 15.6  | 13            | 9.5  | 22.5  | 13            | 10.5 | 25.6  | 13              | 12.5 | 28.5  |
| 14          | 5.6  | 10.4  | 14            | 6.5  | 13.5  | 14            | 7.5  | 15.5  | 14              | 8.5  | 16.5  |
| 15          | 3.4  | 6.7   | 15            | 3.5  | 15.6  |               |      |       | 15              | 4.5  | 15.5  |
| 16          | 4.5  | 13.5  | 16            | 4.6  | 11.4  |               |      |       | 16              | 6.7  | 11.5  |
| 17          | 5.6  | 15.6  | 17            | 5.3  | 16.5  |               |      |       | 17              | 6.8  | 14.5  |
| 18          | 2.3  | 16.7  | 18            | 3.5  | 16.5  |               |      |       | 18              | 6.9  | 13.5  |
|             |      |       | 19            | 5.6  | 11.4  |               |      |       |                 |      |       |
|             |      |       | 20            | 2.4  | 8.5   |               |      |       |                 |      |       |
|             |      |       | 21            | 3.5  | 6.5   |               |      |       |                 |      |       |
|             |      |       | 22            | 4.5  | 8.5   |               |      |       |                 |      |       |

Olive oil and seeds

| Branded oil |      |      | Unbranded oil |      |      | Branded seeds |      |      | Unbranded seeds |      |      |
|-------------|------|------|---------------|------|------|---------------|------|------|-----------------|------|------|
| SR. #       | AFB1 | TAFs | SR.#          | AFB1 | TAFs | SR. #         | AFB1 | TF   | SR.#            | AFB1 | TF   |
| 1           | 2.4  | 5.6  | 1             | 3.5  | 6.7  | 1             | 3.4  | 6.7  | 1               | 6.7  | 11.5 |
| 2           | 3.5  | 9.8  | 2             | 4.5  | 11.5 | 2             | 4.5  | 10.5 | 2               | 6.9  | 15.7 |
| 3           | 2.4  | 11.8 | 3             | 3.4  | 13.5 | 3             | 4.6  | 7.6  | 3               | 9.6  | 15.7 |
| 4           | 34.5 | 58.9 | 4             | 39.8 | 65.6 | 4             | 45.7 | 81.9 | 4               | 55.7 | 86.7 |
| 5           | 37.8 | 44.5 | 5             | 42.5 | 58.7 | 5             | 56.8 | 76.5 | 5               | 58.9 | 78.9 |
| 6           | 2.4  | 7.6  | 6             | 3.4  | 9.8  | 6             | 3.4  | 9.5  | 6               | 4.5  | 6.7  |
| 7           | 2.5  | 4.5  | 7             | 3.5  | 6.5  | 7             | 3.5  | 6.5  | 7               | 7.8  | 13.5 |
| 8           | 2.3  | 6.7  | 8             | 2.6  | 7.8  | 8             | 4.5  | 9.5  | 8               | 5.6  | 14.5 |
|             |      |      | 9             |      |      | 9             |      |      | 9               | 6.7  | 12.4 |
|             |      |      |               |      |      | 10            |      |      | 10              | 2.4  | 4.5  |
|             |      |      |               |      |      | 11            |      |      |                 |      |      |
|             |      |      |               |      |      | 12            |      |      |                 |      |      |
|             |      |      |               |      |      | 13            |      |      |                 |      |      |
|             |      |      |               |      |      | 14            |      |      |                 |      |      |
|             |      |      |               |      |      | 15            |      |      |                 |      |      |
|             |      |      |               |      |      | 16            |      |      |                 |      |      |

Corn oil and seeds

| Branded oil |      |      | Unbranded oil |      |      | Branded seeds |      |      | Unbranded seeds |      |      |
|-------------|------|------|---------------|------|------|---------------|------|------|-----------------|------|------|
| SR. #       | AFB1 | TF   | SR.#          | AFB1 | TF   | SR. #         | AFB1 | TF   | SR.#            | AFB1 | TF   |
| 1           | 6.5  | 10.5 | 1             | 7.5  | 13.5 | 1             | 8.5  | 15.6 | 1               | 9.6  | 16.5 |
| 2           | 4.5  | 7.8  | 2             | 5.6  | 9.8  | 2             | 7.8  | 10.7 | 2               | 6.8  | 11.6 |
| 3           | 6.7  | 9.8  | 3             | 8.9  | 11.5 | 3             | 9.6  | 20.5 | 3               | 10.5 | 22.5 |
| 4           | 4.5  | 6.8  | 4             | 9.7  | 15.4 | 4             | 11.4 | 20.6 | 4               | 12.5 | 24.5 |

|    |      |      |    |      |      |    |      |      |    |      |      |
|----|------|------|----|------|------|----|------|------|----|------|------|
| 5  | 5.6  | 6.5  | 5  | 6.7  | 9.8  | 5  | 6.8  | 11.5 | 5  | 7.5  | 13.5 |
| 6  | 6.8  | 7.8  | 6  | 7.1  | 7.9  | 6  | 9.6  | 11.5 | 6  | 10.5 | 13.5 |
| 7  | 4.5  | 6.5  | 7  | 5.4  | 7.6  | 7  | 6.8  | 15.6 | 7  | 7.5  | 16.7 |
| 8  | 3.5  | 9.8  | 8  | 5.6  | 8.7  | 8  | 6.7  | 18.9 | 8  | 7.6  | 20.5 |
| 9  | 21.5 | 32.5 | 9  | 29.6 | 44.5 | 9  | 36.5 | 46.5 | 9  | 40.5 | 48.5 |
| 10 | 45.6 | 81.5 | 10 | 48.9 | 84.6 | 10 | 57.6 | 89.7 | 10 | 58.8 | 95.7 |
|    |      |      | 11 | 22.4 | 29.7 | 11 | 26.7 | 36.5 | 11 | 28.6 | 47.8 |
|    |      |      | 12 | 7.8  | 9.5  | 12 | 9.5  | 11.5 | 12 | 10.5 | 15.6 |
|    |      |      | 13 | 2.5  | 11.5 | 13 | 3.5  | 6.7  | 13 | 5.6  | 7.8  |
|    |      |      | 14 | 4.5  | 9.8  | 14 | 5.6  | 7.11 | 14 | 8.9  | 11.5 |
|    |      |      | 15 | 34.6 | 45.6 | 15 | 49.7 | 65.6 | 15 | 57.8 | 87.5 |
|    |      |      | 16 | 8.9  | 11.3 | 16 | 37.8 | 83.6 | 16 | 39.5 | 87.5 |
|    |      |      | 17 | 2.4  | 4.5  | 17 | 2.5  | 7.8  | 17 | 4.5  | 9.7  |
|    |      |      | 18 | 34.6 | 39.7 | 18 | 56.7 | 87.6 | 18 | 59.8 | 95.6 |
|    |      |      | 19 | 3.5  | 6.7  | 19 | 2.5  | 7.8  | 21 | 3.5  | 9.7  |
|    |      |      | 20 | 2.5  | 4.5  | 20 | 3.5  | 7.8  | 22 | 4.5  | 9.8  |
|    |      |      |    |      |      | 21 | 7.8  | 9.4  | 23 | 9.5  | 12.4 |
|    |      |      |    |      |      | 22 | 2.5  | 6.5  | 24 | 3.5  | 9.7  |
|    |      |      |    |      |      | 23 | 4.5  | 6.7  | 25 | 5.6  | 7.8  |
|    |      |      |    |      |      | 24 | 2.4  | 5.6  | 26 | 4.5  | 9.5  |
|    |      |      |    |      |      | 25 | 9.8  | 11.4 | 27 | 10.5 | 15.5 |
|    |      |      |    |      |      |    |      |      | 28 | 4.5  | 9.6  |
|    |      |      |    |      |      |    |      |      | 29 | 3.5  | 10.5 |
|    |      |      |    |      |      |    |      |      | 30 | 2.5  | 15.5 |

Mustard oil and seeds

| Branded oil |      |      | Unbranded oil |      |      | Branded seeds |      |      | Unbranded seeds |      |      |
|-------------|------|------|---------------|------|------|---------------|------|------|-----------------|------|------|
| SR. #       | AFB1 | TAFs | SR.#          | AFB1 | TAFs | SR. #         | AFB1 | TAFs | SR.#            | AFB1 | TAFs |
| 1           | 2.34 | 4.78 | 1             | 4.5  | 9.7  | 1             | 4.6  | 6.7  | 1               | 5.4  | 7.8  |
| 2           | 5.41 | 9.70 | 2             | 6.8  | 11.2 | 2             | 6.5  | 10.6 | 2               | 7.5  | 11.3 |
| 3           | 2.31 | 11.4 | 3             | 4.5  | 13.6 | 3             | 3.5  | 11.9 | 3               | 4.3  | 10.6 |
| 4           | 18.9 | 29.8 | 4             | 21.5 | 34.6 | 4             | 19.3 | 30.5 | 4               | 20.4 | 32.5 |
| 5           | 8.70 | 19.7 | 5             | 9.8  | 23.5 | 5             | 9.5  | 20.6 | 5               | 8.5  | 22.5 |
| 6           | 9.12 | 22.5 | 6             | 10.5 | 24.6 | 6             | 10.5 | 23.5 | 6               | 11.5 | 24.5 |
| 7           | 22.6 | 32.7 | 7             | 24.7 | 36.7 | 7             | 24.5 | 33.6 | 7               | 25.5 | 35.4 |
| 8           | 12.5 | 19.7 | 8             | 14.5 | 39.8 | 8             | 14.5 | 21.6 | 8               | 15.4 | 22.5 |
| 9           | 10.7 | 45.7 | 9             | 16.7 | 55.7 | 9             | 11.6 | 46.7 | 9               | 12.5 | 47.5 |
| 10          | 15.7 | 26.8 | 10            | 17.5 | 29.8 | 10            | 16.6 | 28.9 | 10              | 18.6 | 30.5 |
| 11          | 12.6 | 34.6 | 11            | 14.6 | 36.6 | 11            | 13.5 | 36.7 | 11              | 14.3 | 38.5 |
| 12          | 10.6 | 19.8 | 12            | 12.5 | 22.5 | 12            | 12.5 | 21.5 | 12              | 13.5 | 22.5 |
| 13          | 12.7 | 23.6 | 13            | 14.6 | 25.7 | 13            | 13.5 | 24.5 | 13              | 15.5 | 25.6 |
| 14          | 10.8 | 35.7 | 14            | 12.6 | 38.7 | 14            | 11.5 | 36.8 | 14              | 12.5 | 38.9 |
| 15          | 9.8  | 11.6 | 15            | 11.4 | 13.6 | 15            | 11.4 | 13.4 | 15              | 13.5 | 15.5 |
| 16          | 12.5 | 18.9 | 16            | 13.6 | 21.5 | 16            | 13.5 | 20.5 | 16              | 14.5 | 22.5 |
| 17          | 9.6  | 14.6 | 17            | 10.7 | 16.4 | 17            | 10.5 | 15.6 | 17              | 11.5 | 16.5 |
| 18          | 2.4  | 8.9  | 18            | 3.5  | 10.6 | 18            | 3.5  | 10.5 | 18              | 4.5  | 12.5 |
| 19          | 1.6  | 3.5  | 19            | 2.5  | 5.6  | 19            | 2.5  | 15.6 | 19              | 3.5  | 11.5 |
| 20          | 3.5  | 8.9  | 20            | 5.4  | 9.19 | 20            | 4.5  | 10.8 | 20              | 5.4  | 12.5 |
| 21          | 4.9  | 10.7 | 21            | 6.5  | 11.6 |               |      |      | 21              | 6.5  | 10.8 |
|             |      |      | 22            | 7.9  | 16.8 |               |      |      | 22              | 7.8  | 34.6 |
|             |      |      | 23            | 10.5 | 14.5 |               |      |      | 23              | 19.5 | 21.5 |
|             |      |      | 24            | 11.4 | 18.9 |               |      |      |                 |      |      |
|             |      |      | 25            | 12.5 | 16.5 |               |      |      |                 |      |      |
|             |      |      | 26            | 10.5 | 14.5 |               |      |      |                 |      |      |
|             |      |      | 27            | 9.5  | 10.6 |               |      |      |                 |      |      |
|             |      |      | 28            | 4.5  | 8.6  |               |      |      |                 |      |      |

**Food Frequency Questionnaire**

|             |            |                              |
|-------------|------------|------------------------------|
| Full Name   | Age (y)    | Sex                          |
| Weight (kg) | City       | District                     |
| CNIN        | Height (m) | Covid 19= Positive/ Negative |

Please put a tick on your concerned line

| Product name | Never experienced | Seldom used | Per day consumption |                    |                   |                   | Per week consumption | Per month consumption |
|--------------|-------------------|-------------|---------------------|--------------------|-------------------|-------------------|----------------------|-----------------------|
|              |                   |             | <u>150-200 mL</u>   | <u>200- 350 mL</u> | <u>350-500 mL</u> | <u>&gt;500 mL</u> |                      |                       |
| Sunflower    |                   |             |                     |                    |                   |                   |                      |                       |
| Soyabean     |                   |             |                     |                    |                   |                   |                      |                       |
| Canola       |                   |             |                     |                    |                   |                   |                      |                       |
| Olive        |                   |             |                     |                    |                   |                   |                      |                       |
| Corn         |                   |             |                     |                    |                   |                   |                      |                       |
| Mustard      |                   |             |                     |                    |                   |                   |                      |                       |

Consent: I give my full consent to use my information for research purpose

First Name: -----

Signature/Date: -----

Middle Name: -----

Family Name: -----

Education:

Cell No:
